# Supplementary material
Source: MDPI journal article supplement (https://www.mdpi.com/2073-4344/12/11/1404)
Supplement: s1 [file s1]

*Supplementary Materials*

*for*

**Computational Insight into Defective Boron Nitride Supported  
Double-Atom Catalysts for Electrochemical Nitrogen Reduction**

Rong Cao<sup>1,2</sup>, Jie-Zhen Xia<sup>1,2</sup> and Qi Wu<sup>1,2,3\*</sup>

<sup>1</sup>*School of Science, Tibet University, Lhasa 850000, China*

<sup>2</sup>*Institute of Oxygen Supply, Center of Tibetan Studies (Everest Research Institute),  
Tibet University, Lhasa 850000, China*

<sup>3</sup>*Key Laboratory of Cosmic Rays (Tibet University), Ministry of Education, Lhasa  
850000, China*

\*Correspondence: wuqi@utibet.edu.cn

**Table S1.** Computed cohesive energy ( $E_{\text{coh}}$ ) and adsorption energy ( $E_{\text{a}}$ ) of TM dimer (TM= Ti, Fe, Mo and Ru) anchored on the B-vacancy.

|              | $E_{\text{coh/TM1}}$ | $E_{\text{coh/TM2}}$ | $E_{\text{ads}}$ | $E_{\text{coh}}$ | $E_{\text{ads}}-E_{\text{coh}}$ | $E_{\text{f}}$ |
|--------------|----------------------|----------------------|------------------|------------------|---------------------------------|----------------|
| <b>Fe-Fe</b> | -4.86                | -4.86                | -10.88           | -4.86            | -0.58                           | -1.18          |
| <b>Fe-Mo</b> | -4.86                | -6.29                | -11.45           | -5.58            | -0.15                           | -1.15          |
| <b>Fe-Ru</b> | -4.86                | -6.76                | -12.02           | -5.81            | -0.20                           | -1.15          |
| <b>Fe-Ti</b> | -4.86                | -5.45                | -12.71           | -5.16            | -1.20                           | -1.20          |
| <b>Mo-Mo</b> | -6.29                | -6.29                | -12.62           | -6.29            | -0.02                           | -1.10          |
| <b>Mo-Ru</b> | -6.29                | -6.76                | -13.25           | -6.53            | -0.10                           | -1.12          |
| <b>Mo-Ti</b> | -6.29                | -5.45                | -12.30           | -5.87            | -0.28                           | -1.16          |
| <b>Ru-Ru</b> | -6.76                | -6.76                | -13.76           | -6.76            | -0.12                           | -1.12          |
| <b>Ru-Ti</b> | -6.76                | -5.45                | -13.67           | -6.11            | -0.73                           | -1.18          |
| <b>Ti-Ti</b> | -5.45                | -5.45                | -14.12           | -5.45            | -1.61                           | -1.22          |

**Table S2.** Calculated the amount of the transferred electrons from the anchored TM atoms to the  $V_{\text{B}}\text{-BN}$  ( $Q$  in  $e$ ) of  $\text{TM}_1\text{-TM}_2@V_{\text{B}}\text{-BN}$ .

|              | $Q$  |
|--------------|------|
| <b>Fe-Fe</b> | 1.61 |
| <b>Fe-Mo</b> | 1.54 |
| <b>Fe-Ru</b> | 1.53 |
| <b>Fe-Ti</b> | 1.75 |
| <b>Mo-Mo</b> | 1.59 |
| <b>Mo-Ru</b> | 1.53 |
| <b>Mo-Ti</b> | 1.77 |
| <b>Ru-Ru</b> | 1.15 |
| <b>Ru-Ti</b> | 1.71 |
| <b>Ti-Ti</b> | 1.97 |

**Table S3.** Calculated bond lengths of adsorbed  $^*\text{N}_2$  ( $d_{\text{N-N}}$  in Å) and the amount of charge that  $^*\text{N}_2$  gained from the  $\text{TM}_1\text{-TM}_2@V_{\text{B}}\text{-BN}$  catalysts ( $Q$  in  $e$ ).

|              | $Q/\text{end-on}$ | $d_{\text{N-N}}/\text{end-on}$ | $Q/\text{side-on}$ | $d_{\text{N-N}}/\text{side-on}$ |
|--------------|-------------------|--------------------------------|--------------------|---------------------------------|
| <b>Fe-Fe</b> | 0.35              | 1.143                          | 0.48               | 1.180                           |
| <b>Fe-Mo</b> | 0.43              | 1.145                          | 0.55               | 1.189                           |
| <b>Fe-Ru</b> | 0.41              | 1.143                          | 0.51               | 1.184                           |
| <b>Fe-Ti</b> | 0.41              | 1.146                          | 0.56               | 1.190                           |
| <b>Mo-Mo</b> | 0.48              | 1.150                          | 0.86               | 1.263                           |
| <b>Mo-Ru</b> | 0.52              | 1.154                          | 0.84               | 1.255                           |
| <b>Mo-Ti</b> | 0.52              | 1.153                          | 0.72               | 1.230                           |
| <b>Ru-Ru</b> | 0.39              | 1.141                          | 0.52               | 1.195                           |
| <b>Ru-Ti</b> | 0.41              | 1.145                          | 0.48               | 1.179                           |
| <b>Ti-Ti</b> | 0.53              | 1.153                          | 0.82               | 1.220                           |
| <b>Ti-Ru</b> | 0.48              | 1.149                          | 0.63               | 1.210                           |
| <b>Ti-Mo</b> | 0.50              | 1.151                          | 0.74               | 1.230                           |
| <b>Ti-Fe</b> | 0.51              | 1.152                          | 0.72               | 1.220                           |
| <b>Ru-Mo</b> | 0.39              | 1.145                          | 0.52               | 1.194                           |
| <b>Ru-Fe</b> | 0.39              | 1.144                          | 0.46               | 1.180                           |
| <b>Mo-Fe</b> | 0.52              | 1.154                          | 0.84               | 1.253                           |

**Table S4:** Calculated free energy changes of the first hydrogenation step ( $\Delta G^{*N_2 \rightarrow *N_2H}$ ) and the last hydrogenation step ( $\Delta G^{*NH_2 \rightarrow *NH_3}$ ) for 16 TM<sub>1</sub>-TM<sub>2</sub>@V<sub>B</sub>-BN catalysts. "/" indicates that TM atoms cannot adsorb intermediate  $*N_2H$ .

|                            | Fe-Fe | Fe-Mo | Fe-Ru | Fe-Ti | Mo-Mo | Mo-Ru | Mo-Ti | Ru-Ru |
|----------------------------|-------|-------|-------|-------|-------|-------|-------|-------|
| $*N_2 \rightarrow *N_2H/e$ | 0.94  | 0.91  | 1.10  | 0.81  | 0.38  | 0.29  | /     | 0.54  |
| $*N_2 \rightarrow *N_2H/s$ | -     | 1.1   | 0.80  | 0.99  | 0.52  | -0.25 | 0.15  | 0.58  |
| $*NH_2 \rightarrow *NH_3$  | 0.32  | 0.24  | 0.23  | 0.29  | 0.80  | 0.63  | 1.00  | 0.14  |

  

|                            | Ru-Ti | Ti-Ti | Ti-Ru | Ti-Mo | Ti-Fe | Ru-Mo | Ru-Fe | Mo-Fe |
|----------------------------|-------|-------|-------|-------|-------|-------|-------|-------|
| $*N_2 \rightarrow *N_2H/e$ | 0.53  | 0.45  | -     | -     | -0.22 | 0.47  | 0.93  | /     |
| $*N_2 \rightarrow *N_2H/s$ | 0.40  | 0.28  | 0.27  | 0.24  | 0.23  | 0.53  | /     | 0.26  |
| $*NH_2 \rightarrow *NH_3$  | -0.08 | 1.03  | 1.02  | 1.16  | 1.00  | 0.05  | 0.22  | 1.10  |

**Table S5:** The magnetic moments( $M_{\mu B}$ ) of TMs in TM<sub>1</sub>-TM<sub>2</sub>@V<sub>B</sub>-BN catalysts.

|                               | $M_1(Ru)$ | $M_2(Mo/Ru/Ti)$ |
|-------------------------------|-----------|-----------------|
| <b>Ru-Mo@V<sub>B</sub>-BN</b> | 1.548     | 2.250           |
| <b>Ru-Ru@V<sub>B</sub>-BN</b> | 1.079     | 1.044           |
| <b>Ru-Ti@V<sub>B</sub>-BN</b> | 1.595     | 0.422           |

**Table S6:** The Gibbs free energies changes for each intermediate on Ru-Mo@V<sub>B</sub>-BN via distal, alternating and enzymatic mechanisms at 298.15 K (in eV).

| Ru-Mo (Distal)                        | $\Delta G(eV)$ |
|---------------------------------------|----------------|
| $*+ N_2 \rightarrow *N_2$             | -1.05          |
| $*N_2+H^++e^- \rightarrow *N_2H$      | 0.47           |
| $*N_2H+H^++e^- \rightarrow *N_2H_2$   | -0.06          |
| $*N_2H_2+H^++e^- \rightarrow *N+NH_3$ | -0.48          |
| $*N_2+H^++e^- \rightarrow *NH$        | -0.26          |
| $*NH+H^++e^- \rightarrow *NH_2$       | -0.24          |
| $*NH_2+H^++e^- \rightarrow *NH_3$     | 0.05           |

| Ru-Mo (Alternating)                        | $\Delta G(eV)$ |
|--------------------------------------------|----------------|
| $*+ N_2 \rightarrow *N_2$                  | -1.05          |
| $*N_2+H^++e^- \rightarrow *NNH$            | 0.47           |
| $*NNH+H^++e^- \rightarrow *NHNH$           | 0.92           |
| $*NHNH+H^++e^- \rightarrow *NHNH_2$        | -0.43          |
| $*NHNH_2+H^++e^- \rightarrow *NH_2NH_2$    | -1.01          |
| $*NH_2NH_2+H^++e^- \rightarrow *NH_2+NH_3$ | -0.52          |
| $*NH_2+H^++e^- \rightarrow *NH_3$          | 0.05           |

| Ru-Mo (Enzymatic)                          | $\Delta G(eV)$ |
|--------------------------------------------|----------------|
| $*+ N_2 \rightarrow *N_2$                  | -0.70          |
| $*N_2+H^++e^- \rightarrow *NNH$            | 0.53           |
| $*NNH+H^++e^- \rightarrow *NHNH$           | 0.07           |
| $*NHNH+H^++e^- \rightarrow *NHNH_2$        | -0.32          |
| $*NHNH_2+H^++e^- \rightarrow *NH_2NH_2$    | -1.13          |
| $*NH_2NH_2+H^++e^- \rightarrow *NH_2+NH_3$ | -0.10          |
| $*NH_2+H^++e^- \rightarrow *NH_3$          | 0.09           |

**Table S7:** Computed vibrational frequencies, zero-point energies and entropy of reaction intermediates on Ru-Mo@V<sub>B</sub>-BN, where \* denotes the adsorption site.

| Reaction Intermediates           | Vibrational Frequencies (cm <sup>-1</sup> ) |         |         |         |         |         | ZPE (eV) | TS (eV) |
|----------------------------------|---------------------------------------------|---------|---------|---------|---------|---------|----------|---------|
| *N <sub>2</sub>                  | 2107.12                                     | 417.67  | 406.77  | 398.43  | 62.59   | 47.39   | 0.21     | 0.15    |
| *N <sub>2</sub> H                | 3233.30                                     | 1685.80 | 1107.83 | 534.11  | 436.35  | 397.75  | 0.49     | 0.16    |
|                                  | 390.32                                      | 45.58   | 27.81   |         |         |         |          |         |
| *N <sub>2</sub> H <sub>2</sub>   | 3512.72                                     | 3346.95 | 1552.70 | 1321.20 | 1180.83 | 608.77  | 0.81     | 0.17    |
|                                  | 459.51                                      | 364.69  | 357.16  | 298.08  | 84.51   | 49.29   |          |         |
| *NHNH                            | 3363.45                                     | 3241.89 | 1327.46 | 1118.70 | 1024.25 | 823.28  | 0.79     | 0.15    |
|                                  | 667.11                                      | 454.15  | 388.08  | 207.47  | 99.80   | 89.12   |          |         |
| *N                               | 1043.11                                     | 123.60  | 118.88  |         |         |         | 0.08     | 0.08    |
| *NH                              | 3277.22                                     | 859.21  | 672.44  | 626.26  | 112.18  | 105.81  | 0.35     | 0.10    |
| *NH <sub>2</sub>                 | 3464.65                                     | 3380.44 | 1512.27 | 640.43  | 634.89  | 585.07  | 0.67     | 0.13    |
|                                  | 460.58                                      | 118.53  | 44.05   |         |         |         |          |         |
| *NH <sub>3</sub>                 | 3491.58                                     | 3482.26 | 3389.81 | 1608.27 | 1601.25 | 1140.12 | 1.01     | 0.13    |
|                                  | 546.92                                      | 509.10  | 336.12  | 99.85   | 60.85   | 36.32   |          |         |
| *NHNH <sub>2</sub>               | 3450.19                                     | 3363.38 | 3353.46 | 1577.09 | 1339.37 | 1081.41 | 1.15     | 0.18    |
|                                  | 1018.78                                     | 901.47  | 670.18  | 624.36  | 451.54  | 409.33  |          |         |
|                                  | 138.65                                      | 94.69   | 57.53   |         |         |         |          |         |
| *NH <sub>2</sub> NH <sub>2</sub> | 3479.48                                     | 3477.35 | 3385.93 | 3383.53 | 1499.78 | 1493.69 | 1.31     | 0.20    |
|                                  | 748.18                                      | 745.28  | 598.92  | 544.45  | 526.22  | 414.91  |          |         |
|                                  | 311.43                                      | 191.88  | 128.77  | 119.81  | 102.29  | 48.75   |          |         |
| *H                               | 1999.04                                     | 610.06  | 570.74  |         |         |         | 0.20     | 0.02    |

**Table S8:** The Gibbs free energies changes for each intermediate on Ru-Ru@V<sub>B</sub>-BN via distal, alternating and enzymatic mechanisms at 298.15 K (in eV).

| Ru-Ru (Distal)                                                                                      | ΔG(eV) |
|-----------------------------------------------------------------------------------------------------|--------|
| *+ N <sub>2</sub> →*N <sub>2</sub>                                                                  | -1.12  |
| *N <sub>2</sub> +H <sup>+</sup> +e <sup>-</sup> →*N <sub>2</sub> H                                  | 0.54   |
| *N <sub>2</sub> H+H <sup>+</sup> +e <sup>-</sup> →*N <sub>2</sub> H <sub>2</sub>                    | 0.31   |
| *N <sub>2</sub> H <sub>2</sub> +H <sup>+</sup> +e <sup>-</sup> →*N+NH <sub>3</sub>                  | -1.26  |
| *N <sub>2</sub> +H <sup>+</sup> +e <sup>-</sup> →*NH                                                | 0.31   |
| *NH+H <sup>+</sup> +e <sup>-</sup> →*NH <sub>2</sub>                                                | -0.56  |
| *NH <sub>2</sub> +H <sup>+</sup> +e <sup>-</sup> →*NH <sub>3</sub>                                  | 0.14   |
| Ru-Ru (Alternating)                                                                                 | ΔG(eV) |
| *+ N <sub>2</sub> →*N <sub>2</sub>                                                                  | -1.12  |
| *N <sub>2</sub> +H <sup>+</sup> +e <sup>-</sup> →*NNH                                               | 0.54   |
| *NNH+H <sup>+</sup> +e <sup>-</sup> →*NHNH                                                          | 0.59   |
| *NHNH+H <sup>+</sup> +e <sup>-</sup> →*NHNH <sub>2</sub>                                            | -0.08  |
| *NHNH <sub>2</sub> +H <sup>+</sup> +e <sup>-</sup> →*NH <sub>2</sub> NH <sub>2</sub>                | 0.39   |
| *NH <sub>2</sub> NH <sub>2</sub> +H <sup>+</sup> +e <sup>-</sup> →*NH <sub>2</sub> +NH <sub>3</sub> | -2.10  |
| *NH <sub>2</sub> +H <sup>+</sup> +e <sup>-</sup> →*NH <sub>3</sub>                                  | 0.14   |
| Ru-Ru (Enzymatic)                                                                                   | ΔG(eV) |
| *+ N <sub>2</sub> →*N <sub>2</sub>                                                                  | -0.68  |
| *N <sub>2</sub> +H <sup>+</sup> +e <sup>-</sup> →*NNH                                               | 0.58   |

|                                            |       |
|--------------------------------------------|-------|
| $*NNH+H^++e^- \rightarrow *NHNH$           | -0.04 |
| $*NHNH+H^++e^- \rightarrow *NHNH_2$        | -0.26 |
| $*NHNH_2+H^++e^- \rightarrow *NH_2NH_2$    | 0.82  |
| $*NH_2NH_2+H^++e^- \rightarrow *NH_2+NH_3$ | -2.20 |
| $*NH_2+H^++e^- \rightarrow *NH_3$          | 0.14  |

**Table S9:** Computed vibrational frequencies, zero-point energies and entropy of reaction intermediates on Ru-Ru@V<sub>B</sub>-BN, where \* denotes the adsorption site.

| Reaction Intermediates           | Vibrational Frequencies (cm <sup>-1</sup> ) |         |         |         |         |         | ZPE (eV) | TS (eV) |
|----------------------------------|---------------------------------------------|---------|---------|---------|---------|---------|----------|---------|
| *N <sub>2</sub>                  | 2120.32                                     | 381.68  | 316.86  | 314.88  | 41.68   | 29.24   | 0.20     | 0.18    |
| *N <sub>2</sub> H                | 3238.89                                     | 1396.32 | 1136.18 | 591.75  | 468.09  | 370.16  | 0.47     | 0.17    |
|                                  | 208.62                                      | 79.32   | 52.73   |         |         |         |          |         |
| *N <sub>2</sub> H <sub>2</sub>   | 3490.15                                     | 3359.23 | 1567.99 | 1312.66 | 1170.58 | 553.60  | 0.79     | 0.21    |
|                                  | 422.11                                      | 305.33  | 279.11  | 230.75  | 31.05   | 13.20   |          |         |
| *NHNH                            | 3290.06                                     | 3250.63 | 1378.05 | 1147.33 | 1015.21 | 901.94  | 0.81     | 0.15    |
|                                  | 732.07                                      | 534.86  | 433.14  | 194.44  | 98.44   | 91.07   |          |         |
| *N                               | 1078.67                                     | 134.44  | 131.53  |         |         |         | 0.08     | 0.08    |
| *NH                              | 3341.41                                     | 840.12  | 441.65  | 296.04  | 105.60  | 103.52  | 0.32     | 0.12    |
| *NH <sub>2</sub>                 | 3493.43                                     | 3398.43 | 1506.55 | 673.68  | 591.49  | 493.03  | 0.66     | 0.14    |
|                                  | 332.02                                      | 103.50  | 44.74   |         |         |         |          |         |
| *NH <sub>3</sub>                 | 3477.26                                     | 3475.56 | 3383.58 | 1602.96 | 1601.68 | 1143.19 | 1.01     | 0.19    |
|                                  | 535.45                                      | 534.07  | 354.81  | 132.27  | 48.39   | 42.53   |          |         |
| *NHNH <sub>2</sub>               | 3448.34                                     | 3358.66 | 3351.79 | 1583.77 | 1332.65 | 1086.24 | 1.14     | 0.17    |
|                                  | 1014.74                                     | 896.92  | 666.04  | 560.93  | 451.47  | 382.40  |          |         |
|                                  | 90.82                                       | 64.35   |         |         |         |         |          |         |
| *NH <sub>2</sub> NH <sub>2</sub> | 3386.20                                     | 3383.03 | 3306.45 | 3304.82 | 1591.83 | 1571.85 | 1.47     | 0.20    |
|                                  | 1334.03                                     | 1064.12 | 1051.77 | 1001.89 | 932.81  | 554.61  |          |         |
|                                  | 426.11                                      | 303.64  | 284.63  | 118.83  | 94.08   | 76.08   |          |         |
| *H                               | 1822.17                                     | 430.87  | 360.30  |         |         |         | 0.16     | 0.03    |

**Table S10:** The Gibbs free energies changes for each intermediate on Ru-Ti@V<sub>B</sub>-BN via distal, alternating and enzymatic mechanisms at 298.15 K (in eV).

| Ru-Ti (Distal)                                                                                      | ΔG(eV) |
|-----------------------------------------------------------------------------------------------------|--------|
| *+ N <sub>2</sub> →*N <sub>2</sub>                                                                  | -1.20  |
| *N <sub>2</sub> +H <sup>+</sup> +e <sup>-</sup> →*N <sub>2</sub> H                                  | 0.53   |
| *N <sub>2</sub> H+H <sup>+</sup> +e <sup>-</sup> →*N <sub>2</sub> H <sub>2</sub>                    | 0.33   |
| *N <sub>2</sub> H <sub>2</sub> +H <sup>+</sup> +e <sup>-</sup> →*N+NH <sub>3</sub>                  | -0.67  |
| *N <sub>2</sub> +H <sup>+</sup> +e <sup>-</sup> →*NH                                                | -0.19  |
| *NH+H <sup>+</sup> +e <sup>-</sup> →*NH <sub>2</sub>                                                | -0.43  |
| *NH <sub>2</sub> +H <sup>+</sup> +e <sup>-</sup> →*NH <sub>3</sub>                                  | -0.08  |
| Ru-Ti (Alternating)                                                                                 | ΔG(eV) |
| *+ N <sub>2</sub> →*N <sub>2</sub>                                                                  | -1.20  |
| *N <sub>2</sub> +H <sup>+</sup> +e <sup>-</sup> →*NNH                                               | 0.53   |
| *NNH+H <sup>+</sup> +e <sup>-</sup> →*NHNH                                                          | 0.85   |
| *NHNH+H <sup>+</sup> +e <sup>-</sup> →*NHNH <sub>2</sub>                                            | -0.37  |
| *NHNH <sub>2</sub> +H <sup>+</sup> +e <sup>-</sup> →*NH <sub>2</sub> NH <sub>2</sub>                | -0.75  |
| *NH <sub>2</sub> NH <sub>2</sub> +H <sup>+</sup> +e <sup>-</sup> →*NH <sub>2</sub> +NH <sub>3</sub> | 1.45   |

|                                                                                              |                                         |
|----------------------------------------------------------------------------------------------|-----------------------------------------|
| $*\text{NH}_2 + \text{H}^+ + \text{e}^- \rightarrow * \text{NH}_3$                           | -0.08                                   |
| <hr/>                                                                                        |                                         |
| <b>Ru-Ti (Enzymatic)</b>                                                                     | <b><math>\Delta G(\text{eV})</math></b> |
| $* + \text{N}_2 \rightarrow * \text{N}_2$                                                    | -0.89                                   |
| $* \text{N}_2 + \text{H}^+ + \text{e}^- \rightarrow * \text{NNH}$                            | 0.40                                    |
| $* \text{NNH} + \text{H}^+ + \text{e}^- \rightarrow * \text{NHNH}$                           | 0.30                                    |
| $* \text{NHNH} + \text{H}^+ + \text{e}^- \rightarrow * \text{NHNH}_2$                        | -0.58                                   |
| $* \text{NHNH}_2 + \text{H}^+ + \text{e}^- \rightarrow * \text{NH}_2\text{NH}_2$             | -0.97                                   |
| $* \text{NH}_2\text{NH}_2 + \text{H}^+ + \text{e}^- \rightarrow * \text{NH}_2 + \text{NH}_3$ | 0.11                                    |
| $* \text{NH}_2 + \text{H}^+ + \text{e}^- \rightarrow * \text{NH}_3$                          | -0.06                                   |

**Table S11:** Computed vibrational frequencies, zero-point energies and entropy of reaction intermediates on Ru-Ti@V<sub>B</sub>-BN, where \* denotes the adsorption site.

| Reaction Intermediates           | Vibrational Frequencies (cm <sup>-1</sup> ) |         |         |         |         |         | ZPE (eV) | TS (eV) |
|----------------------------------|---------------------------------------------|---------|---------|---------|---------|---------|----------|---------|
| *N <sub>2</sub>                  | 1866.94                                     | 456.23  | 346.86  | 182.48  | 69.03   | 64.36   | 0.19     | 0.16    |
| *N <sub>2</sub> H                | 3226.17                                     | 1693.91 | 1112.10 | 533.82  | 473.61  | 414.45  | 0.49     | 0.17    |
|                                  | 386.53                                      | 50.50   | 41.79   |         |         |         |          |         |
| *N <sub>2</sub> H <sub>2</sub>   | 3474.90                                     | 3360.86 | 1556.31 | 1243.89 | 1161.16 | 586.85  | 0.79     | 0.15    |
|                                  | 554.95                                      | 372.39  | 371.79  | 106.06  | 31.91   | 45.35   |          |         |
| *NHNH                            | 3262.46                                     | 3234.06 | 1490.72 | 1368.86 | 1274.10 | 1046.76 | 0.82     | 0.20    |
|                                  | 553.94                                      | 487.70  | 298.14  | 117.70  | 57.15   | 40.99   |          |         |
| *N                               | 1036.61                                     | 149.83  | 137.31  |         |         |         | 0.08     | 0.07    |
| *NH                              | 3191.15                                     | 850.46  | 639.47  | 633.04  | 51.74   | 45.34   | 0.34     | 0.14    |
| *NH <sub>2</sub>                 | 3457.87                                     | 3373.42 | 1517.11 | 663.21  | 649.58  | 578.04  | 0.68     | 0.13    |
|                                  | 489.40                                      | 128.18  | 58.95   |         |         |         |          |         |
| *NH <sub>3</sub>                 | 3473.71                                     | 3455.43 | 3365.88 | 1613.83 | 1597.40 | 1156.67 | 1.02     | 0.16    |
|                                  | 603.15                                      | 567.83  | 357.82  | 120.71  | 107.01  | 74.60   |          |         |
| *NHNH <sub>2</sub>               | 3483.88                                     | 3355.74 | 3320.19 | 1588.52 | 1428.92 | 1165.03 | 1.14     | 0.20    |
|                                  | 1090.56                                     | 783.59  | 683.60  | 534.50  | 337.48  | 294.68  |          |         |
|                                  | 184.80                                      | 68.32   | 21.86   |         |         |         |          |         |
| *NH <sub>2</sub> NH <sub>2</sub> | 3514.43                                     | 3371.47 | 3331.33 | 1952.63 | 1582.64 | 1452.44 | 1.37     | 0.18    |
|                                  | 1191.06                                     | 1113.59 | 803.51  | 782.77  | 745.19  | 669.31  |          |         |
|                                  | 572.87                                      | 367.52  | 318.96  | 232.44  | 91.35   | 71.56   |          |         |
| *H                               | 1930.02                                     | 631.48  | 534.22  |         |         |         | 0.19     | 0.01    |

**Table S12:** Charge variations of Ru-Ti dimer, V<sub>B</sub>-BN substrate and N<sub>x</sub>H<sub>y</sub> species on Ru-Ti@V<sub>B</sub>-BN.

|                                  | Ru-Ti | Substrate | N <sub>x</sub> H <sub>y</sub> |
|----------------------------------|-------|-----------|-------------------------------|
| <b>Slab</b>                      | 1.71  | -1.71     | 0.00                          |
| *N <sub>2</sub>                  | 2.10  | -1.62     | -0.48                         |
| *N <sub>2</sub> H                | 2.10  | -1.68     | -0.42                         |
| *NHNH                            | 2.19  | -1.64     | -0.55                         |
| *NH <sub>2</sub> NH              | 2.01  | -1.79     | -0.22                         |
| *NH <sub>2</sub> NH <sub>2</sub> | 2.37  | -1.61     | -0.76                         |
| *NH <sub>2</sub>                 | 2.00  | -1.66     | -0.34                         |
| *NH <sub>3</sub>                 | 1.70  | -1.83     | 0.12                          |

**Table S13:** Bond lengths of Ru-Ti, N-N and Ru-N on Ru-Ti@V<sub>B</sub>-BN.

|                                  | Ru-Ti | N-N  | Ru-N |
|----------------------------------|-------|------|------|
| <b>slab</b>                      | 2.66  | -    | -    |
| *N <sub>2</sub>                  | 2.54  | 1.17 | 2.04 |
| *N <sub>2</sub> H                | 2.46  | 1.25 | 1.93 |
| *NHNH                            | 2.53  | 1.38 | 2.00 |
| *NH <sub>2</sub> NH              | 2.36  | 1.42 | 2.03 |
| *NH <sub>2</sub> NH <sub>2</sub> | 2.54  | 3.03 | 1.96 |
| *NH <sub>2</sub>                 | 2.90  | -    | 1.90 |
| *NH <sub>3</sub>                 | 2.82  | -    | 2.17 |

**Table S14:** The calculated total energies (Energy-DFT), zero-points energy (ZPE) and entropy corrections (TS), in eV, for the gas phase N<sub>2</sub>, H<sub>2</sub>, NH<sub>3</sub> species of NRR (T = 298.15 K, P = 1 bar). In comparison, the experimental entropies (TS<sub>exp</sub>) of the gas phase N<sub>2</sub>, H<sub>2</sub>, NH<sub>3</sub> species are also shown, which are from NIST standard reference database.

| Species             | Energy-DFT | ZPE  | TS   | Gibbs  | TS <sub>exp</sub> |
|---------------------|------------|------|------|--------|-------------------|
| H <sub>2</sub> (g)  | -6.77      | 0.27 | 0.40 | -6.90  | 0.41              |
| N <sub>2</sub> (g)  | -16.64     | 0.15 | 0.59 | -17.08 | 0.59              |
| NH <sub>3</sub> (g) | -19.54     | 0.91 | 0.60 | -19.23 | 0.60              |

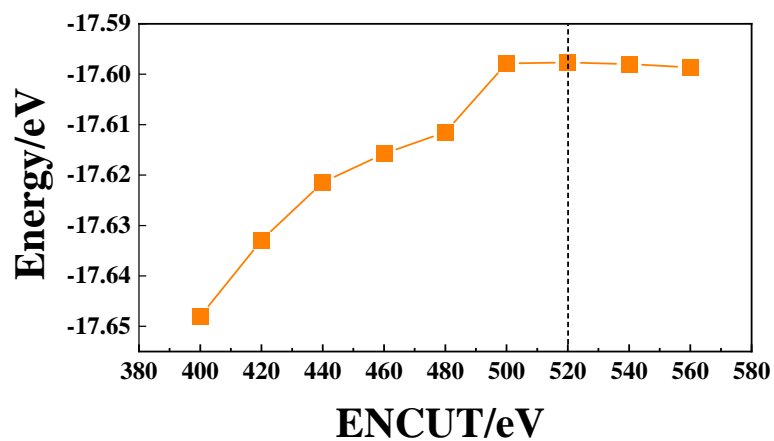

**Figure S1.** Convergence test on the ENCUT value for the BN primitive cell.

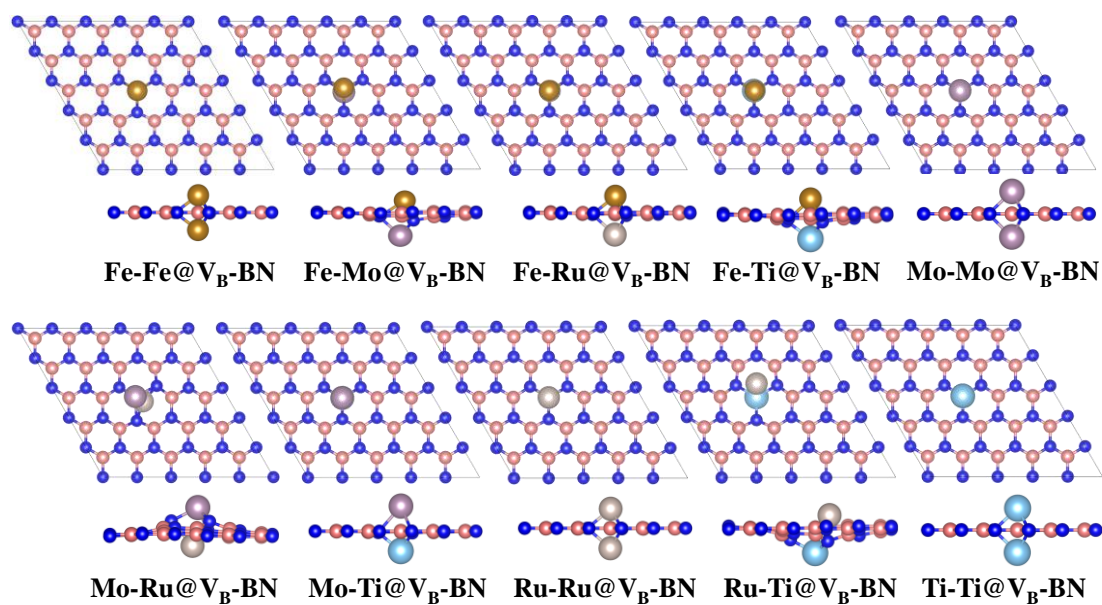

**Figure S2.** Schematic diagrams of the fully relaxed structures of TM<sub>1</sub>-TM<sub>2</sub>@V<sub>B</sub>-BN (TM=Fe, Mo, Ru and Ti).



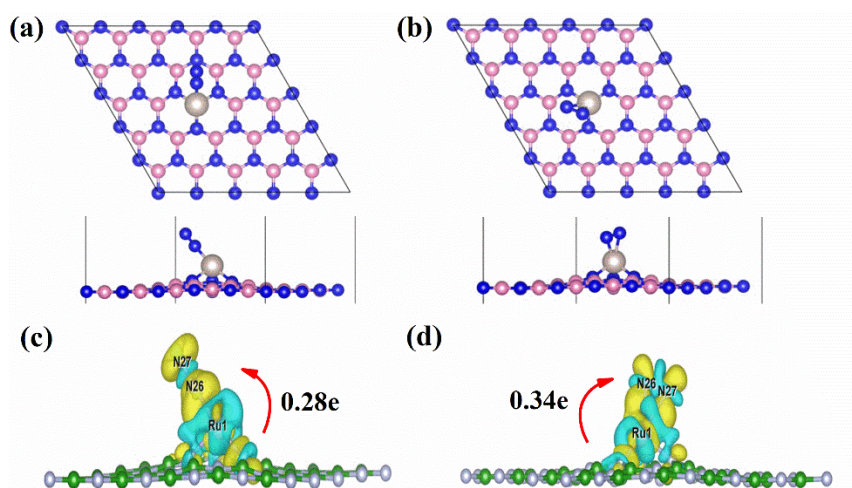

**Figure S3.** Top and side views of N<sub>2</sub> molecule adsorbed on a single Ru atom in (a) end-on and (b) side-on configuration, respectively. Change density differences of N<sub>2</sub> adsorption on Ru@V<sub>B</sub>-BN monolayer for (c) end-on and (d) side-on configurations.

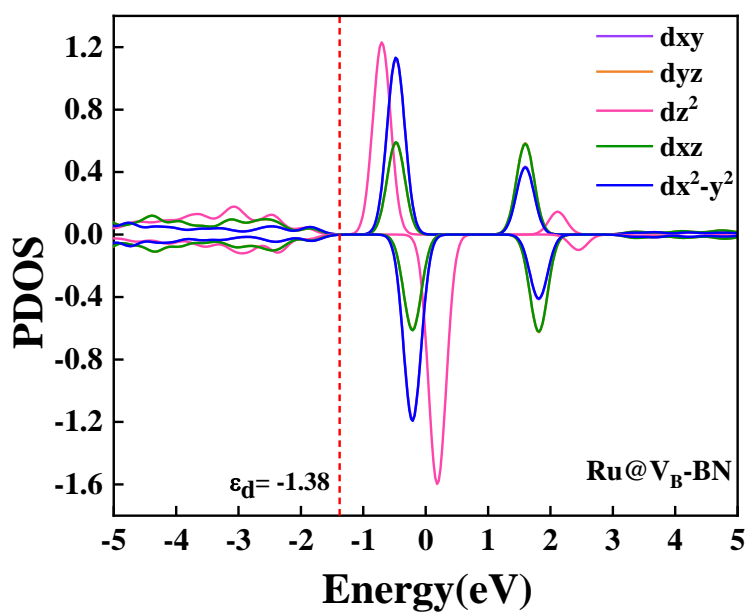

**Figure S4.** Projected density of states (PDOS) of Ru *d* orbitals in Ru@V<sub>B</sub>-BN. The red dotted line represents the position of the *d*-band center.

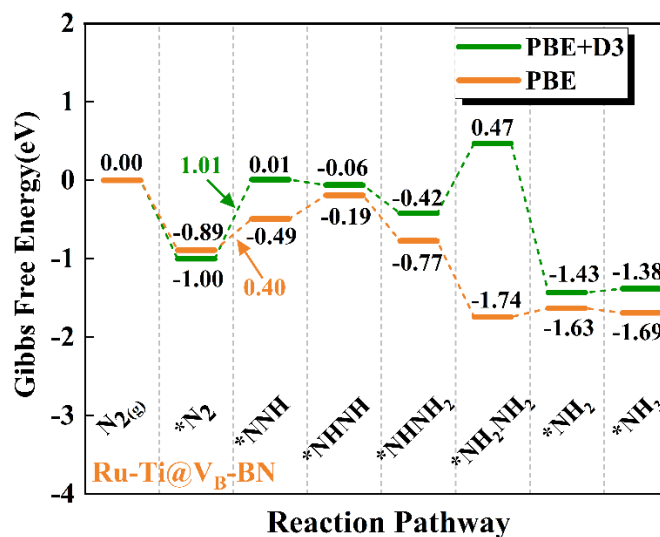

**Figure S5.** Gibbs free energy diagram for  $N_2$  electroreduction on Ru-Ti@V<sub>B</sub>-BN with and without consideration of vdW interaction.

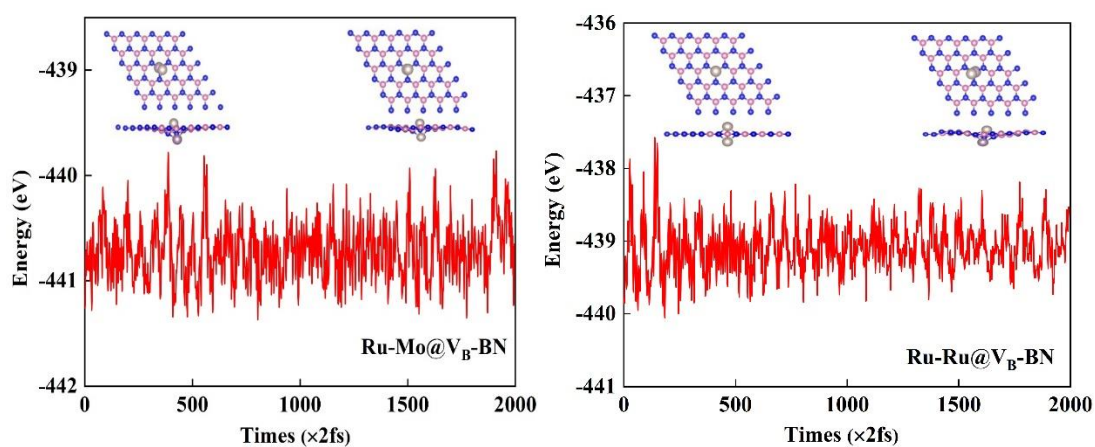

**Figure S6.** Variations of the total energy against the time for the AIMD simulation for Ru-Mo@V<sub>B</sub>-BN and Ru-Ru@V<sub>B</sub>-BN under 400K.
